# Supplementary material for: High color rendering index single phase white light emitting phosphors based on Tb3+/Sm3+ co-doped CePO4 nanocrystals: the role of Tb3+ as a bridge between Ce3+ and Sm3+
Source: Royal Society of Chemistry journal article supplement (doi:10.1039/c9nj00702d), 2019-01-01
Supplement: c9nj00702d1.pdf [file c9nj00702d1.pdf]

Supporting figure S1:

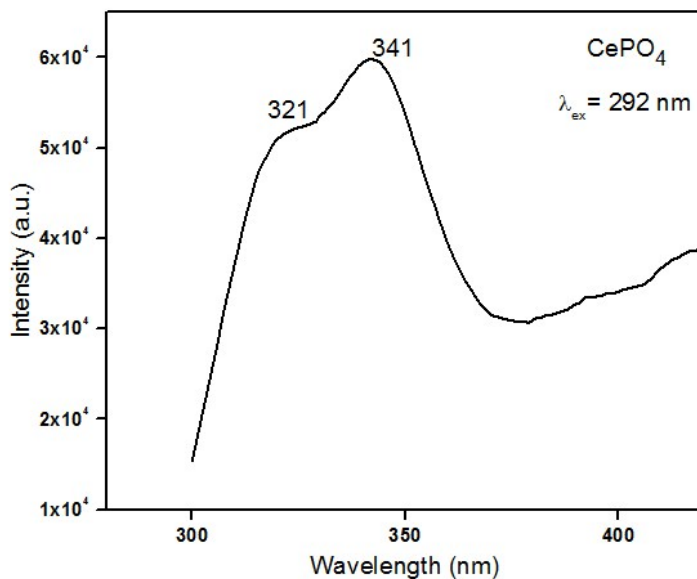

Figure S1: Photoluminescence emission spectra of pure CePO<sub>4</sub>, λ<sub>ex</sub> = 292 nm
